# Supplementary material
Source: PubMed Central journal article supplement (PMC8260055)
Supplement: mjab003_supplementary_data.pdf [file mjab003_supplementary_data.pdf]

## Supplementary material

*for*

### **Kidney injury molecule-1 is a potential receptor for SARS-CoV-2**

*Short title: KIM1 mediates SARS-CoV-2 invasion*

Chen Yang<sup>1,†</sup>, Yu Zhang<sup>1,†</sup>, Xia Zeng<sup>1</sup>, Huijing Chen<sup>1</sup>, Yuchen Chen<sup>1</sup>, Dong Yang<sup>1</sup>, Ziwei Shen<sup>1</sup>,  
Xiaomu Wang<sup>1</sup>, Xinran Liu<sup>1</sup>, Mingrui Xiong<sup>1</sup>, Hong Chen<sup>1,\*</sup>, and Kun Huang<sup>1,2,\*</sup>

<sup>1</sup> School of Pharmacy, Tongji Medical College, Huazhong University of Science & Technology, Wuhan 430030, China

<sup>2</sup> Tongji-RongCheng Biomedical Center, Tongji Medical College, Huazhong University of Science & Technology, Wuhan 430030, China

† These authors contributed equally to this work.

\* Correspondence to: Hong Chen, E-mail: hongchen2017@hust.edu.cn; Kun Huang, E-mail: kunhuang@hust.edu.cn

#### **Table of contents**

Supplementary Table S1 MM-GBSA binding free energy of SARS-CoV-2-RBD and receptors.

Supplementary Table S2 Top 20 clinically identified mutations in SARS-CoV-2 spike protein.

Supplementary Table S3 MM-GBSA binding free energy of residues in SARS-CoV-RBD and KIM1 Ig V complex.

Supplementary Table S4 Primers used in the study.

Supplementary Figure S1 Expression profiles of KIM1, ACE2 and molecular dynamics docking information of SARS-CoV-2-RBD and KIM1.

Supplementary Figure S2 Molecular dynamics simulations information of SARS-CoV-2-RBD and KIM1.

Supplementary Figure S3 Clinically identified mutations in SARS-CoV-2 spike protein

Supplementary Figure S4 Molecular dynamics simulations information of SARS-CoV-RBD and KIM1.

Supplementary Figure S5 Binding model of SARS-CoV-RBD and KIM1.

Supplementary Figure S6 Identification of KIM1 knockout HK-2 cell line and the protective effects of antagonist peptide on SARS-CoV-2-RBD induced cytotoxicity.

**Supplementary Table S1 MM-GBSA binding free energy of SARS-CoV-2-RBD and receptors.**

| Ligand                 | Receptor         | Binding free energy<br>(kcal/mol) |
|------------------------|------------------|-----------------------------------|
| SARS-CoV-RBD           | KIM1 Ig V domain | -21.59                            |
| SARS-CoV-2-RBD         | KIM1 Ig V domain | -35.64                            |
| SARS-CoV-2-RBD (V367F) | KIM1 Ig V domain | -37.26                            |
| SARS-CoV-2-RBD         | ACE2             | -50.60                            |
| MERS-COV-RBD           | KIM1 Ig V domain | -10.12                            |
| SARS-CoV-2-RBD         | AP1              | -7.13                             |
| SARS-CoV-2-RBD         | AP2              | -6.65                             |

MM-GBSA binding free energy of the protein complex was calculated by the accumulation of the binding free energy of all involved residues. The binding free energy of SARS-CoV-2-RBD and ACE2 was also calculated and provided as a reference.

**Supplementary Table S2 Top 20 clinically identified mutations in SARS-CoV-2 spike protein.**

| Rank | Mutation     | Occurrence<br>(Log10) | Rank | Mutation      | Occurrence<br>(Log10) |
|------|--------------|-----------------------|------|---------------|-----------------------|
| 1    | D614G        | 5.016                 | 11   | <u>D294D</u>  | 3.004                 |
| 2    | <u>Q616Q</u> | 3.906                 | 12   | <u>P25P</u>   | 2.961                 |
| 3    | S477N        | 3.886                 | 13   | D936Y         | 2.940                 |
| 4    | <u>T723T</u> | 3.710                 | 14   | <u>N824N</u>  | 2.929                 |
| 5    | A222V        | 3.322                 | 15   | <u>F275F</u>  | 2.892                 |
| 6    | <u>Y789Y</u> | 3.163                 | 16   | P1263L        | 2.866                 |
| 7    | <u>F306F</u> | 3.155                 | 17   | <u>P715P</u>  | 2.779                 |
| 8    | R21I         | 3.050                 | 18   | L54F          | 2.676                 |
| 9    | L5F          | 3.037                 | 19   | D253G         | 2.646                 |
| 10   | N439K        | 3.004                 | 20   | <u>T1100T</u> | 2.598                 |

Synonymous mutations are underlined. Data were acquired on October 5, 2020 from <http://giorgilab.dyndns.org/coronapp/>.

**Supplementary Table S3 MM-GBSA binding free energy of residues in SARS-CoV-RBD and KIM1 Ig V domain complex.**

| Rank | SARS-CoV-RBD |                                | KIM1 Ig V |                                |
|------|--------------|--------------------------------|-----------|--------------------------------|
|      | Residue      | Binding free energy (kcal/mol) | Residue   | Binding free energy (kcal/mol) |
| 1    | Phe360       | -3.67                          | Trp112    | -4.87                          |
| 2    | Val354       | -1.93                          | Phe55     | -4.33                          |
| 3    | Asn424       | -1.34                          | Leu54     | -4.17                          |
| 4    | Trp423       | -1.12                          | Phe113    | -3.62                          |
| 5    | Asn427       | -0.71                          | Gln58     | -1.46                          |
| 6    | Thr359       | -0.69                          | Asn114    | -1.42                          |
| 7    | Ser358       | -0.68                          | Asn59     | -0.54                          |
| 8    | Phe361       | -0.59                          | Asp115    | -0.37                          |
| 9    | Leu355       | -0.45                          | Asp74     | -0.20                          |
| 10   | Asn357       | -0.41                          | Asp99     | -0.20                          |

Top 10 ranked residues that involved in the binding of SARS-CoV-RBD and KIM1 Ig V domain were listed.

**Supplementary Table S4 Primers used in the study.**

| <b>Primer</b>                         | <b>Sequence: 5' to 3'</b>  |
|---------------------------------------|----------------------------|
| <b>Primers for qPCR</b>               |                            |
| M- <i>Ace2</i> -F                     | CAAGTGTGGCTTCGGTGTG        |
| M- <i>Ace2</i> -R                     | ATTCAAGTGACCAGCGAGCA       |
| M- <i>Kim1</i> -F                     | TCCACACATGTACCAACATCAA     |
| M- <i>Kim1</i> -R                     | GTCACAGTGCCATTCCAGTC       |
| M- <i>Actinb</i> -F                   | GGCTGTATTCCCCTCCATCG       |
| M- <i>Actinb</i> -R                   | CCAGTTGGTAACAATGCCATGT     |
| <b>Primers for CRISPR-Cas9 system</b> |                            |
| H- <i>KIMI</i> -KO-1-F                | CACCGCTGACGGCCAATACCACTAA  |
| H- <i>KIMI</i> -KO-1-R                | AAACTTAGTGGTATTGGCCGTCAGC  |
| H- <i>KIMI</i> -KO-2-F                | CACCGGTTTCGAACAGTCGTGACGGT |
| H- <i>KIMI</i> -KO-2-R                | AAACACCGTCACGACTGTTTGAACC  |
| H- <i>KIMI</i> -KO-3-F                | CACCGGTCGTTGGAACAGTCGTCAT  |
| H- <i>KIMI</i> -KO-3-R                | AAACATGACGACTGTTCCAACGACC  |

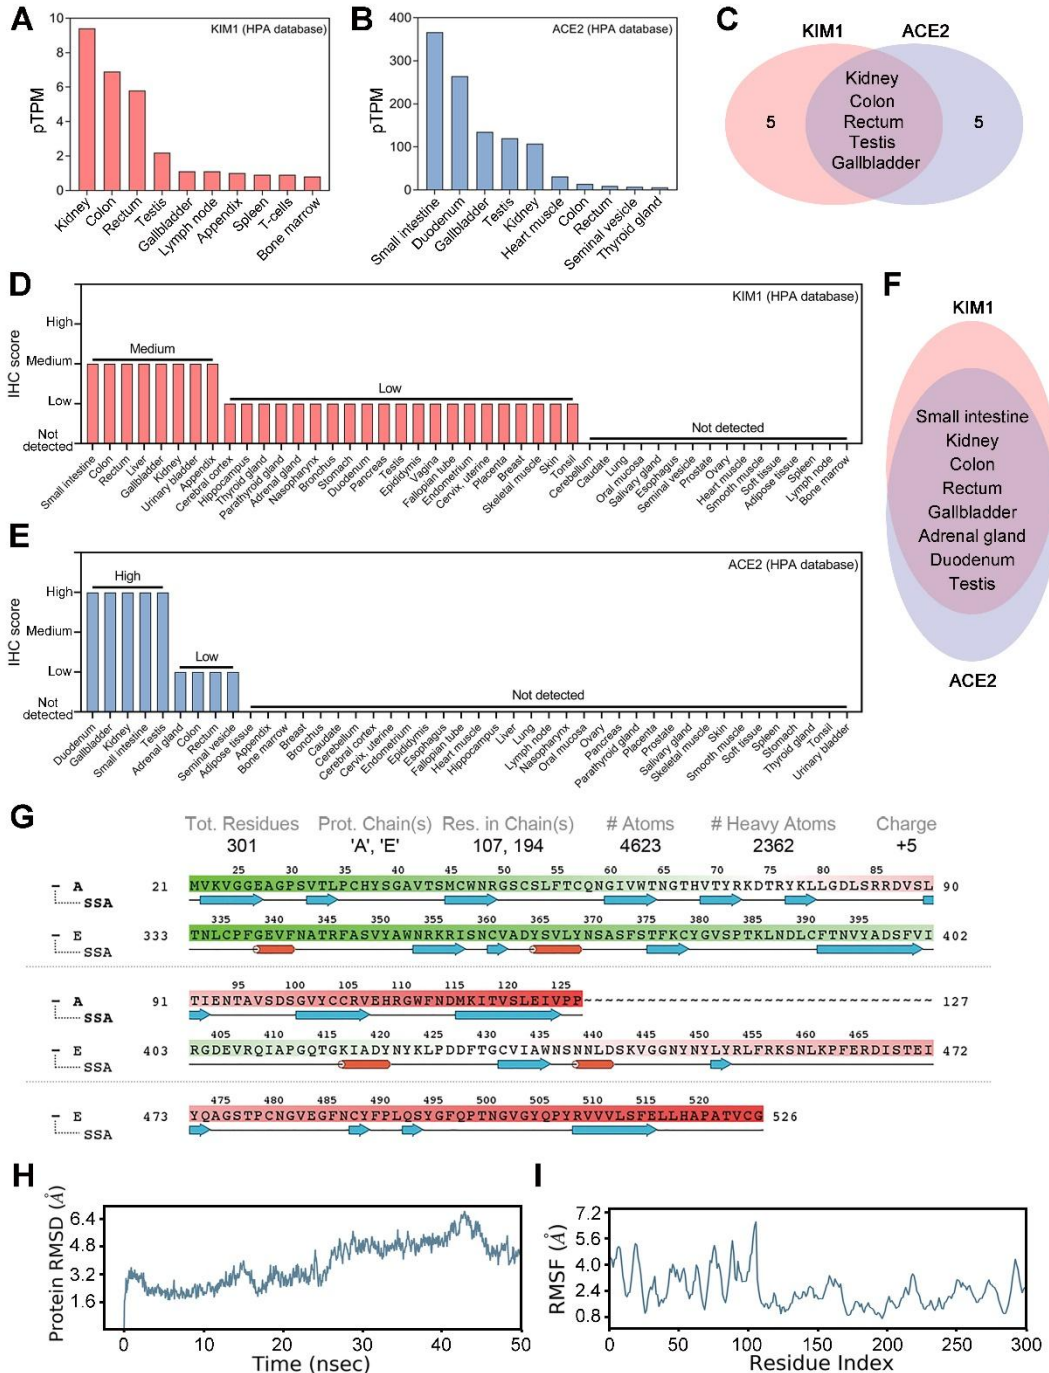

**Supplementary Figure S1** Expression profiles of KIM1, ACE2 and molecular dynamics docking information of SARS-CoV-2-RBD and KIM1. **(A)** Tissue transcriptional expression of *KIM1* from The Human Protein Atlas dataset (HPA). pTPM, protein-coding transcripts per million. **(B)** Tissue transcriptional expression of *ACE2* from HPA. **(C)** Transcriptional expression intersection of *KIM1* and *ACE2* from HPA. **(D)** Histology-based protein expression levels of KIM1. **(E)** Histology-based protein expression levels of ACE2. **(F)** Histology-based protein expression intersection of KIM1 and

ACE2. **(G)** Basic protein information of SARS-CoV-2-RBD and KIM1 Ig V domain. Red cylinder represents  $\alpha$ -Helix structure. Blue arrow indicates  $\beta$ -Sheet structure. **(H)** RMSD values of the SARS-CoV-2-RBD and KIM1 Ig V domain binding models. **(I)** RMSF values of the SARS-CoV-2-RBD and KIM1 Ig V domain binding models.

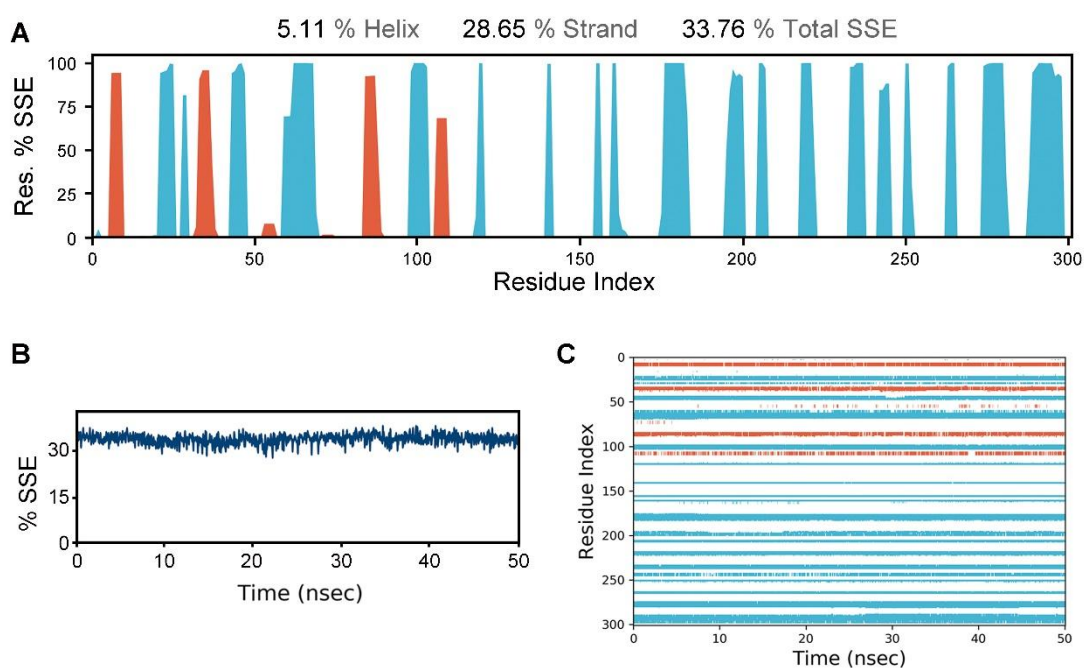

**Supplementary Figure S2** Molecular dynamics simulations information of SARS-CoV-2-RBD and KIM1. **(A)** Residue SSE distribution by residue index throughout the protein structure. Red column suggests  $\alpha$ -Helix structure and blue column indicates  $\beta$ -strand structure. **(B)** SSE composition for trajectory frames in the dynamics simulation process of SARS-CoV-2-RBD and KIM1 Ig V domain, the curve indicates SSE composition for each trajectory frame over the course of the simulation. **(C)** SSE assignment of the residues over the simulation time, red dots indicates  $\alpha$ -Helix structures and blue dots indicate  $\beta$ -strand structures. SSE, secondary structure elements.

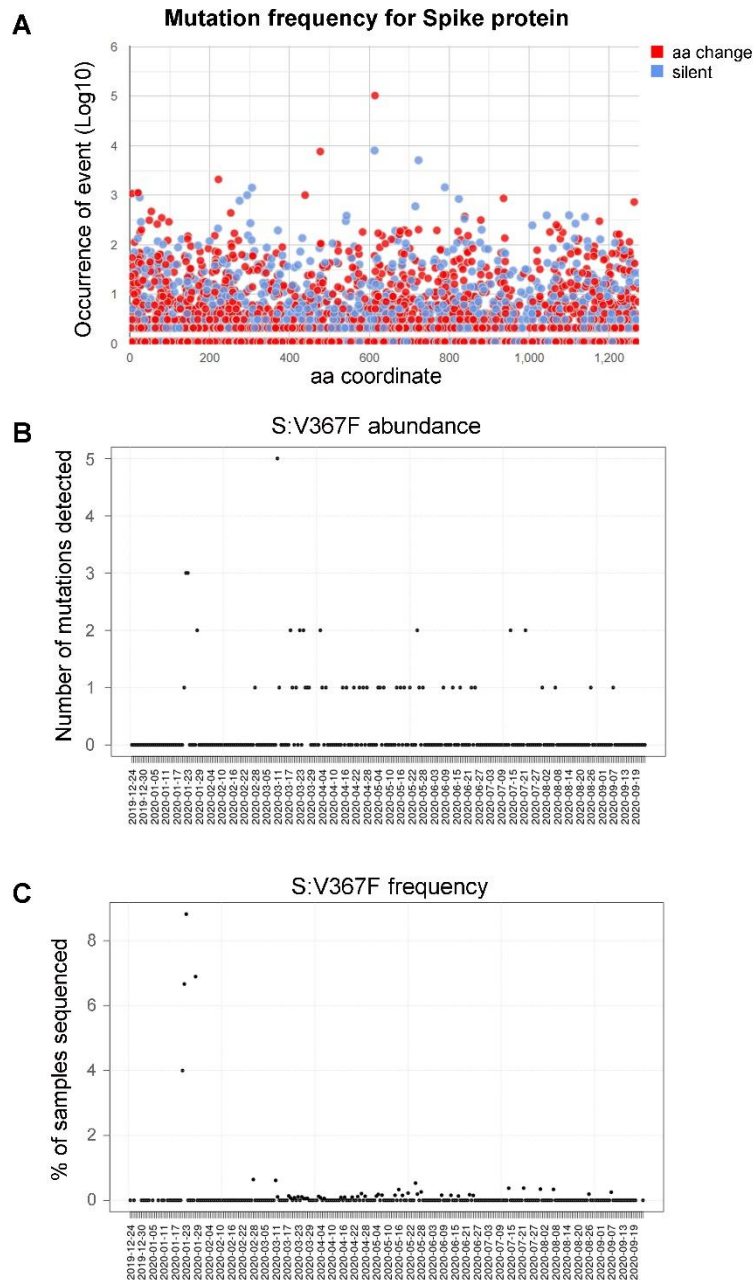

**Supplementary Figure S3** Clinically identified mutations in SARS-CoV-2 spike protein. **(A)** Mutation frequency for SARS-CoV-2 spike protein worldwide. Blue dots indicate synonymous mutation and red dots refer to amino acid substitution. **(B)** The number of clinically detected V367F mutation in COVID-19 patients. **(C)** Percentage of COVID-19 cases carrying V367F mutation. Data were acquired on October 5, 2020 from <http://giorgilab.dyndns.org/coronapp/>.

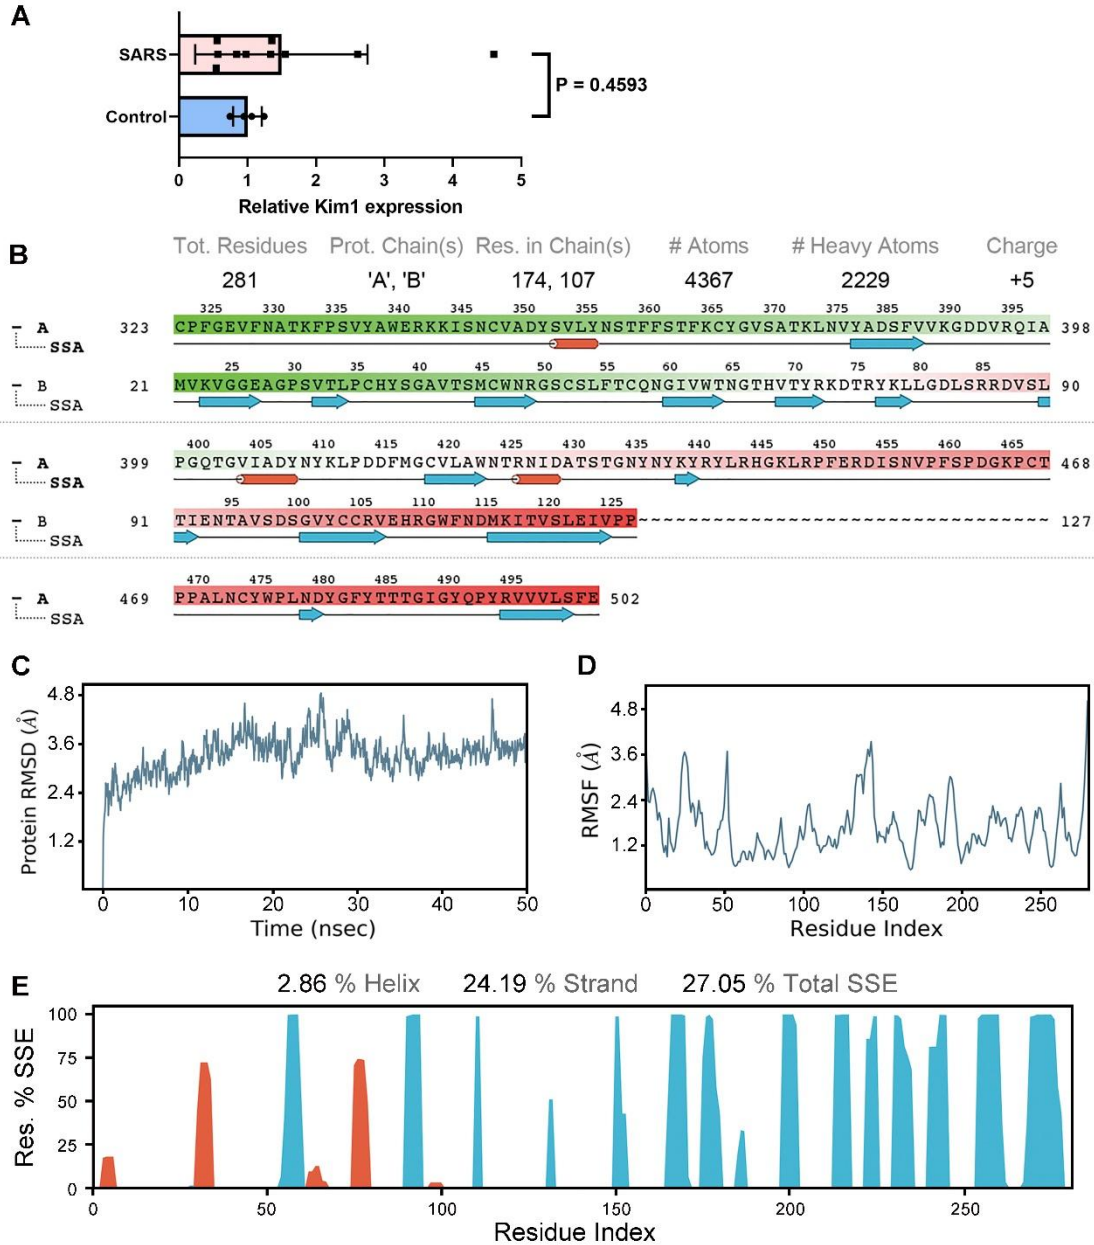

**Supplementary Figure S4** Molecular dynamics simulations information of SARS-CoV-RBD and KIM1. (A) *KIM1* mRNA expression in 10 SARS patients-derived peripheral blood mononuclear cells and 4 control samples (GSE1739). (B) Basic protein information of SARS-CoV-RBD and KIM1 Ig V domain. Red cylinder represents  $\alpha$ -Helix structure of, blue arrow indicates  $\beta$ -Sheet structure. (C) RMSD values of the SARS-CoV-RBD and KIM1 Ig V domain binding models. (D) RMSF values of SARS-CoV-RBD and KIM1 Ig V domain. (E) Residue SSE distribution by residue index throughout the protein structure. Red column suggests  $\alpha$ -Helix structure and blue column indicates  $\beta$ -strand structure. SSE, secondary structure elements.



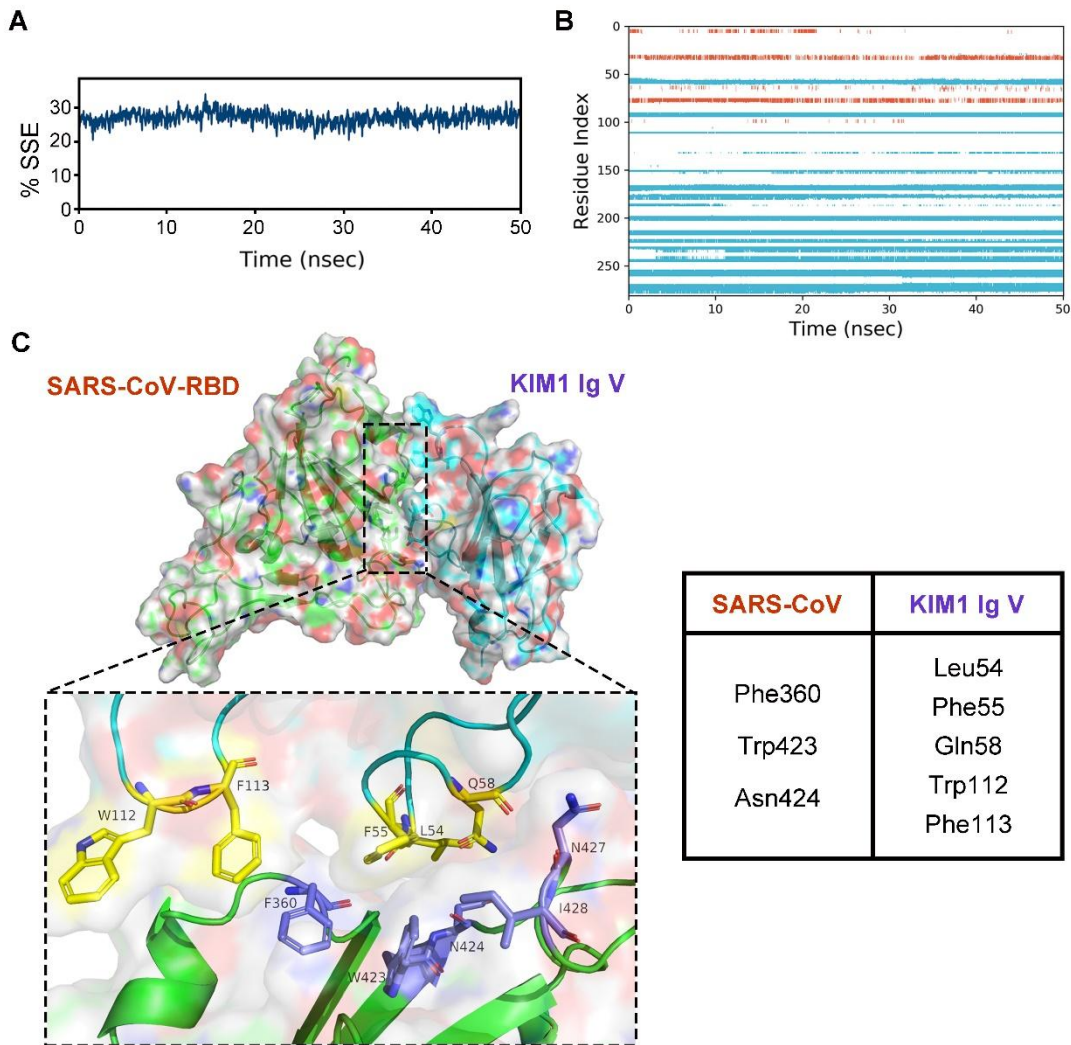

**Supplementary Figure S5** Binding model of SARS-CoV-RBD and KIM1. (A) SSE composition for trajectory frames in the dynamics simulation process of SARS-CoV-RBD and KIM1 Ig V domain, the curve indicates SSE composition for each trajectory frame over the course of the simulation. (B) SSE assignment of the residues over the simulation time, red dots indicate  $\alpha$ -Helix structures and blue dots indicate  $\beta$ -strand structures. (C) Low-energy binding conformations of SARS-CoV-RBD binds to KIM1 Ig V domain. SSE, secondary structure elements.

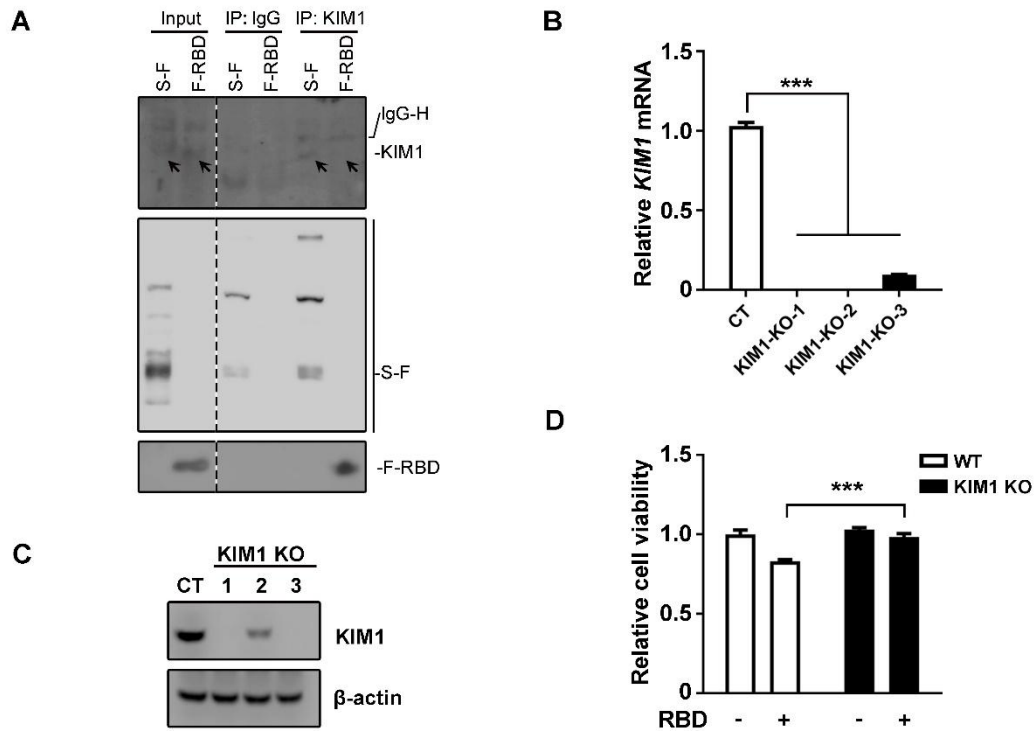

**Supplementary Figure S6** Identification of KIM1 knockout HK-2 cell line and the protective effects of antagonist peptide on SARS-CoV-2-RBD induced cytotoxicity. **(A)** The interaction between endogenous KIM1 and overexpressed Flag-tagged Spike/RBD proteins in HK-2 cells. Mammalian expression plasmids encoding Flag-tagged Spike/RBD were transfected to HK-2 cells ( $1 \times 10^7$ ). 36 hours later, cells were lysed and subjected to co-immunoprecipitation and followed by immunoblotting with indicated antibodies. IgG-H indicates the heavy chain of IgG. **(B)** *KIM1* mRNA expression in WT and KIM1 knockout HK-2 cell line. **(C)** KIM1 protein level in WT and KIM1 knockout HK-2 cell line. **(D)** Cytotoxicity of SARS-CoV-2-RBD in WT and KIM1 knockout HK-2 cell line. \*\*\*  $P < 0.001$ .
